# Supplementary material for: Transcriptomic analysis reveals tomato genes whose expression is induced specifically during effector-triggered immunity and identifies the Epk1 protein kinase which is required for the host response to three bacterial effector proteins
Source: PubMed Central journal article supplement (PMC4223163; doi:10.1186/s13059-014-0492-1), 2014-10-17

**A**

| Plant            | Strain | Concentration              | Time points |
|------------------|--------|----------------------------|-------------|
| RG-PtoR          | DC3000 | 2 x 10 <sup>7</sup> cfu/mL | 4 and 6 h   |
| RG- <i>prf3</i>  |        |                            |             |
| RG- <i>prf19</i> |        |                            |             |

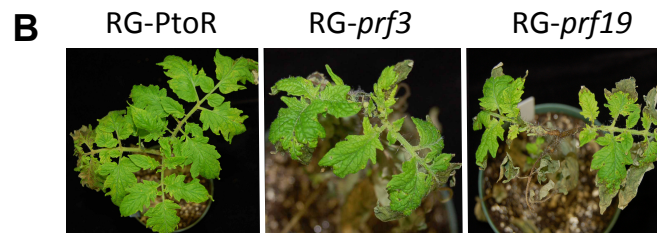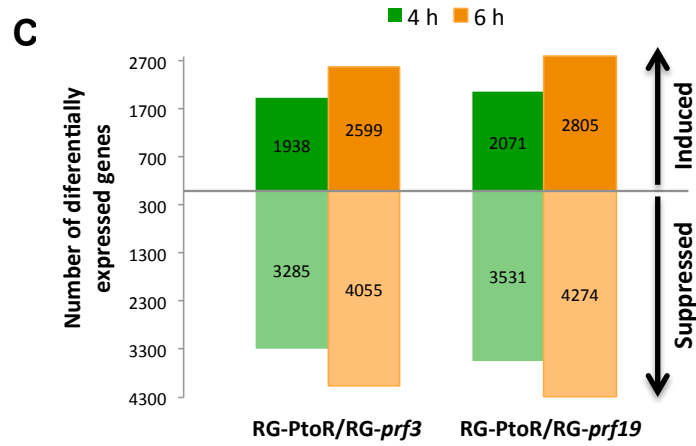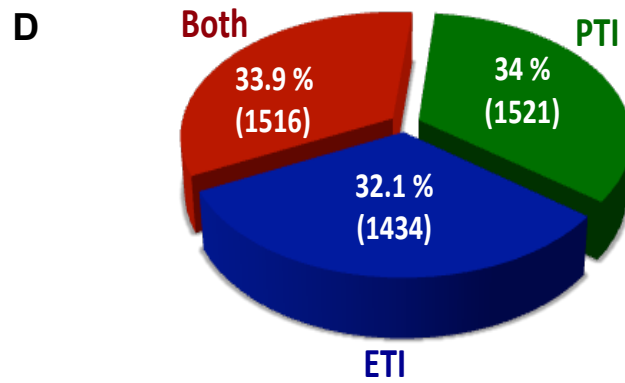

Supplement: 13059_2014_492_MOESM1_ESM.pdf [file 13059_2014_492_MOESM1_ESM.pdf]
