# Supplementary material for: Transcriptomic analysis reveals tomato genes whose expression is induced specifically during effector-triggered immunity and identifies the Epk1 protein kinase which is required for the host response to three bacterial effector proteins
Source: PubMed Central journal article supplement (PMC4223163; doi:10.1186/s13059-014-0492-1), 2014-10-17

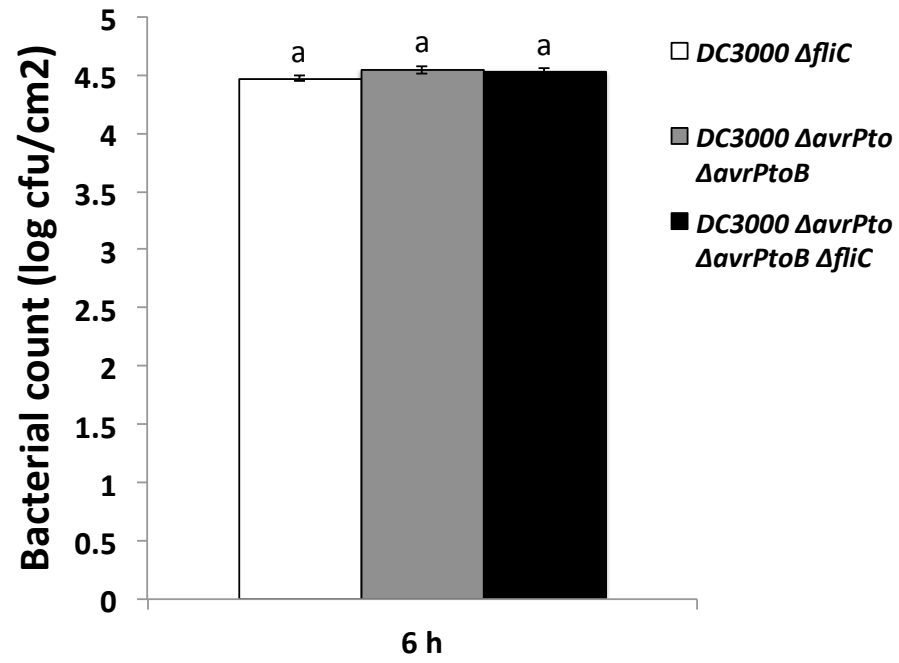

Supplement: 13059_2014_492_MOESM2_ESM.pdf [file 13059_2014_492_MOESM2_ESM.pdf]
