# Supplementary material for: Transcriptomic analysis reveals tomato genes whose expression is induced specifically during effector-triggered immunity and identifies the Epk1 protein kinase which is required for the host response to three bacterial effector proteins
Source: PubMed Central journal article supplement (PMC4223163; doi:10.1186/s13059-014-0492-1), 2014-10-17
Supplement: 13059_2014_492_MOESM7_ESM.pdf [file 13059_2014_492_MOESM7_ESM.pdf]

**Additional file 12: Table S5. Nucleotide sequences of fragments used for VIGS**

| Gene                                   | DNA sequence or reference                                                                                                                                                                                                                                                                                                                                                                                                                                                                                                                                                                                                                                                                                                 |
|----------------------------------------|---------------------------------------------------------------------------------------------------------------------------------------------------------------------------------------------------------------------------------------------------------------------------------------------------------------------------------------------------------------------------------------------------------------------------------------------------------------------------------------------------------------------------------------------------------------------------------------------------------------------------------------------------------------------------------------------------------------------------|
| <i>Ec1 (Escherichia coli fragment)</i> | CGGCGTGATTGCGCAAAGCTATCATCAGTCTGAGAAATCGGCCTCCGAGTTCGATGCCA<br>TTGTTGCGCAAACGGAGCAGTTCCTTGCCGACAATGGTCGTCGCCCGCGCATTCTGATC<br>GCTAAGATGGGCCAGGATGGACACGATCGCGGCGGAAAGTGATCGCCAGCGCCTATTC<br>CGATTCGGTTTCGACGTAGATTTAAGCCCGATGTTCTCTACACCTGAAGAGATCGCCC<br>GCCTGGCCGTAGAAAACGACGTTACAGTAGTGGGCGCATCCTCACTGGCTGCCGGTCAT<br>AAAACGCTGATCCCGGAACTGGTCGAAGCGCTGAAAAAATGGGGACGCGAAGATATCT<br>GCGTGGTCGCGGGTGGCGTCATTCCGCCCGCAGGATTACGCCTTCTCTCAAGAGCGCGGC<br>GTGGCGCGATTTATGGTCCAGGTACACCTATGCTCGACAGTGTGCGCGACCTACTGAA<br>TCTGATAAAGCCAGCATCATGATTAATGAAGCCACGCTGGCAGAAAAGTATTTCG                                                                                                                                              |
| <i>GFP</i>                             | CCTCGGCCGAATTCAGTAAAGGAGAAGAACTTTTCACTGGAGTTGTCCCAATTCCTGTT<br>GAATTAGATGGTGATGTTAATGGGCACAAAATTTCTGTCAGTGGAGAGGGTGAAGGTG<br>ATGCAACATACGGAAAACCTTACCCTTAAATTTATTTGCACTACTGGAAAACCTACCTGTT<br>CCATGGCCAACACTTGTCACTACTTTCTCTTATGGTGTTCAATGCTTTTCAAGATACCC<br>AGATCATATGAAGCGGCACGACTTCTTCAAGAGCGCCATGCCTGAGGGATACGTGCAGG<br>AGAGGACCATCTTCTTCAAGGACGACGGGAACTACAAGACACGTGCTGAAGTCAAGTT<br>TGAGGGAGACACCTCGTCA                                                                                                                                                                                                                                                                                                             |
| <i>NbMAPKKKa</i>                       | CAAGGTCTACAAAAGTTACTCATGTTGGTGTAACCAACGAAGCATATCCTCGTTCCTTT<br>GATGGAACCGGACGCGCCAGTGTGGATTCCGGTGGAAGGAATTTTCTCCAATAA<br>AGGAAACTATGCAAGCCATCCAGTGATCACCATCTCTAGACCATTGAGCTGCCCAAGGG<br>AAATTGTA AAAACCATAAACATCTTTACCAGTATCCCCACTTCTAGCCCATTAAGACAG<br>TATGAACCTGCACGTAGGAGCTGTTATCTTTCTTCCCAACCCAGCTTATGGTATTGG<br>GGGTATAGTGGATATGATGAGAATGATTACTTAATGTTTCAAGCCAGACCCACCACA<br>AGAAACACACTAGAACCATGGCTTGAATCCCTCAATTTAAAGTTCAGACACCGTCTAG<br>ATCGCCAAAATAAGACCAATCTTTAGTACCTCGGCCGCGACCCGTCACCCAGCTTT<br>CTTGTA AAAAGTGGTATATCGTCGACCGCCGATGAACGGTTAAGTTTCCATTGATACT<br>CGAAAGATGTCAGCACCCAGCTAGCACAAACACAGCCCATAGGGTCAACTACCTCAACTAC<br>CACAAAACTGCAGGCGGCAACTCCNTGCCACAGCTTCAGGCCTGTTCACTATCCCGGA<br>TGGGGGATTTCTTTA |
| <i>NtMEK2</i>                          | [1]                                                                                                                                                                                                                                                                                                                                                                                                                                                                                                                                                                                                                                                                                                                       |
| <i>SIPrf</i>                           | TGTCATCTCAATCGTTGGCATGCCAGGATTGGGCAAGACTACACTAGCAAAGAAGATT<br>TACAATGATCCAGAAGTCACCTCTCGCTTCGATGTCCATGTCAATGTGTTGTGACTCA<br>ATTATATTCATGGAGAGGTTGTTGTCACCATTTTGAATGATGTGCTTGAGCCTTCTG<br>ATCGCAATGAAAAAGAAGATGGAGAAATAGCTGATGAGCTACGCCGATTTTTGTTGAC<br>CAAGAGATCTTGATTCTCATTGATGATGTGTGGGAC                                                                                                                                                                                                                                                                                                                                                                                                                               |
| <i>NbSAG101</i>                        | TGCTAGGTCTTTTGGGGTCTTCAACTTACTCAAAGGCCAAGAATATGAGTCAGGATT<br>CCTTGTTTAGTAGTGCCAAAGAATTGGCAAAGTTGGTGGTGAGCTCAGATCTACTGCA<br>TGATTCTTGGGCTAGAAAATTGTGATCTTCTTAATCATGCTTATTTGGATAATCCAACTA<br>ACCCAGCTCCAATTGTGTTCAAAGTTTATTACCCATATTATACAAATGGTGCTATTGTT<br>GCTTTTGTATCCTCCCTACCTGTAGTATTCATCATCTTCAGAAAGAAATGGTCTCTTC<br>AGAAGATCTTAAAGGTTCCCAAGTTGATTTTGA                                                                                                                                                                                                                                                                                                                                                                 |
| <i>SIEpk1</i>                          | ACCGGTCATACACCAGAAAGTTGATGTTTATAGTTTTGGCATTGTTCTGTGGGAGCTC<br>ATAACTGGGTGCTTCCTTTCCAGAACATGACTGCTGTGCAGGCTGCTTTTGCTGTTGT<br>CAACAAAGGCGTCCGTCCAACAATCCCATTTGATTGTTTGCCTGTCTTATCTGATATCA<br>TGACCTGCTGCTGGGATTCTGACCCCAATAATAGGCCAACTTCTCTCAGGTTGTCAAG<br>ATGCTTGAGGCAGCTGAGACAGAA                                                                                                                                                                                                                                                                                                                                                                                                                                         |

1. Ekenren SK, Liu Y, Schiff M, Dinesh-Kumar SP, Martin GB: **Two MAPK cascades, NPR1, and TGA transcription factors play a role in Pto-mediated disease resistance in tomato.** *Plant J* 2003, 36:905-917.
