# Supplementary material for: Transcriptomic analysis reveals tomato genes whose expression is induced specifically during effector-triggered immunity and identifies the Epk1 protein kinase which is required for the host response to three bacterial effector proteins
Source: PubMed Central journal article supplement (PMC4223163; doi:10.1186/s13059-014-0492-1), 2014-10-17
Supplement: 13059_2014_492_MOESM10_ESM.pdf [file 13059_2014_492_MOESM10_ESM.pdf]

**Additional file 10: Table S3. Analysis of *SIEpk1* silencing in *N. benthamiana*.** The length of perfect-match stretches of  $\geq 17$  nucleotides is shown. Possible target genes in *N. benthamiana* are shown in bold font. N.C., not considered due to low/no expression or short sequence encoding a likely non-functional protein.

| Gene                      | Nb-35S:Pto<br>DC3000 $\Delta hopQ1-1$ expression (RPKM) | Length (bp) of perfect match<br>stretches $\geq 17$ bp |
|---------------------------|---------------------------------------------------------|--------------------------------------------------------|
| <b>NbS00051202g0009.1</b> | <b>79.83</b>                                            | <b>43, 28, 29</b>                                      |
| <b>NbS00020954g0005.1</b> | <b>83.95</b>                                            | <b>32, 28, 29</b>                                      |
| NbC23305057g0001.1        | 66.97                                                   | N.C.                                                   |
| <b>NbS00014536g0001.1</b> | <b>4.71</b>                                             | <b>26</b>                                              |
| NbS00023433g0102.1        | 41.29                                                   | N.C.                                                   |
| <b>NbS00003176g0019.1</b> | <b>53.86</b>                                            | <b>20, 26</b>                                          |
| NbS00029573g0002.1        | 67.68                                                   | N.C.                                                   |
| <b>NbS00029791g0013.1</b> | <b>51.34</b>                                            | <b>20, 23</b>                                          |
| <b>NbS00042373g0002.1</b> | <b>5.33</b>                                             | <b>23</b>                                              |
| NbS00000863g0005.1        | 0                                                       | N.C.                                                   |
| NbS00014032g0110.1        | 0.72                                                    | N.C.                                                   |
| NbS00039241g0001.1        | 0                                                       | N.C.                                                   |
