# Supplementary material for: Transcriptomic analysis reveals tomato genes whose expression is induced specifically during effector-triggered immunity and identifies the Epk1 protein kinase which is required for the host response to three bacterial effector proteins
Source: PubMed Central journal article supplement (PMC4223163; doi:10.1186/s13059-014-0492-1), 2014-10-17
Supplement: 13059_2014_492_MOESM13_ESM.pdf [file 13059_2014_492_MOESM13_ESM.pdf]

**Additional file 13: Table S6:** Summary of the sequencing data for each of the libraries generated in this work

| Treatment                                        | Replicate      | Total reads | rRNA reads | % rRNA | Clean reads | Mapped reads | % Mapped |
|--------------------------------------------------|----------------|-------------|------------|--------|-------------|--------------|----------|
| <b>PtoR-DC3000</b>                               | 1              | 9,994,651   | 36,242     | 0.3    | 9,958,409   | 8,993,856    | 90.31    |
|                                                  | 2              | 16,861,386  | 103,085    | 0.6    | 16,758,301  | 15,771,011   | 94.11    |
|                                                  | 3              | 13,054,963  | 51,972     | 0.4    | 13,002,991  | 12,109,859   | 93.13    |
|                                                  | <b>Average</b> | 13,303,667  | 63,766     | 0.4    | 13,239,900  | 12,291,575   | 92.5     |
| <b><i>prf3</i>-DC3000</b>                        | 1              | 14,467,697  | 102,886    | 0.7    | 14,364,811  | 13,026,233   | 90.68    |
|                                                  | 2              | 20,262,032  | 473,515    | 2.3    | 19,788,517  | 18,621,095   | 94.1     |
|                                                  | 3              | 12,560,590  | 58,207     | 0.5    | 12,502,383  | 11,609,398   | 92.86    |
|                                                  | <b>Average</b> | 15,763,440  | 211,536    | 1.2    | 15,551,904  | 14,418,909   | 92.5     |
| <b><i>prf19</i>-DC3000</b>                       | 1              | 15,511,557  | 91,430     | 0.6    | 15,420,127  | 13,875,215   | 89.98    |
|                                                  | 2              | 20,223,358  | 503,397    | 2.5    | 19,719,961  | 18,360,424   | 93.11    |
|                                                  | 3              | 11,194,497  | 66,738     | 0.6    | 11,127,759  | 10,362,546   | 93.12    |
|                                                  | <b>Average</b> | 15,643,137  | 220,522    | 1.2    | 15,422,616  | 14,199,395   | 92.1     |
| <b>Total average</b>                             |                | 14,903,415  | 165,275    | 0.944  | 14,738,140  | 13,636,626   | 92.38    |
| <b>PtoR-DC3000 <i>ΔfliC</i></b>                  | 1              | 14,935,433  | 5,125,505  | 34.3   | 9,809,928   | 9,114,331    | 92.91    |
|                                                  | 2              | 12,323,202  | 3,431,511  | 27.8   | 8,891,691   | 8,347,476    | 93.88    |
|                                                  | 3              | 15,199,111  | 2,657,884  | 17.4   | 12,541,227  | 11,843,170   | 94.43    |
|                                                  | <b>Average</b> | 14,152,582  | 3,738,300  | 26.5   | 10,414,282  | 9,768,326    | 93.74    |
| <b>PtoR-DC3000 <i>ΔavrPto ΔavrPtoB</i></b>       | 1              | 15,647,847  | 8,880,310  | 56.7   | 6,767,537   | 6,250,683    | 92.36    |
|                                                  | 2              | 19,905,252  | 1,428,189  | 7.1    | 18,477,063  | 17,344,002   | 93.87    |
|                                                  | 3              | 12,248,832  | 2,938,586  | 23.9   | 9,310,246   | 8,728,766    | 93.75    |
|                                                  | <b>Average</b> | 15,933,977  | 4,415,695  | 29.23  | 11,518,282  | 10,774,484   | 93.33    |
| <b>PtoR-DC3000 <i>ΔfliC ΔavrPto ΔavrPtoB</i></b> | 1              | 13,620,317  | 4,802,212  | 35.2   | 8,818,105   | 8,214,410    | 93.15    |
|                                                  | 2              | 9,938,524   | 2,351,212  | 23.6   | 7,587,312   | 7,090,050    | 93.45    |
|                                                  | 3              | 12,109,823  | 4,629,721  | 38.2   | 7,480,102   | 6,983,701    | 93.36    |
|                                                  | <b>Average</b> | 11,889,555  | 3,927,715  | 32.33  | 7,961,840   | 7,429,387    | 93.32    |
| <b>Total average</b>                             |                | 13,992,038  | 4,027,237  | 29.36  | 9,964,801   | 9,324,065    | 93.46    |
